# Supplementary material for: Stabilizing the Retromer Complex in a Human Stem Cell Model of Alzheimer’s Disease Reduces TAU Phosphorylation Independently of Amyloid Precursor Protein
Source: PubMed Central journal article supplement — Stem Cell Reports. 2018 Mar 1;10(3):1046–58. doi: 10.1016/j.stemcr.2018.01.031 (PMC5919412; doi:10.1016/j.stemcr.2018.01.031), 2018-03-01
Supplement: mmc1.pdf [file mmc1.pdf]

**Stem Cell Reports, Volume 10**

**Supplemental Information**

**Stabilizing the Retromer Complex in a Human Stem Cell Model of Alzheimer's Disease Reduces TAU Phosphorylation Independently of Amyloid Precursor Protein**

**Jessica E. Young, Lauren K. Fong, Harald Frankowski, Gregory A. Petsko, Scott A. Small, and Lawrence S.B. Goldstein**

## Dose Response: R55 and R33

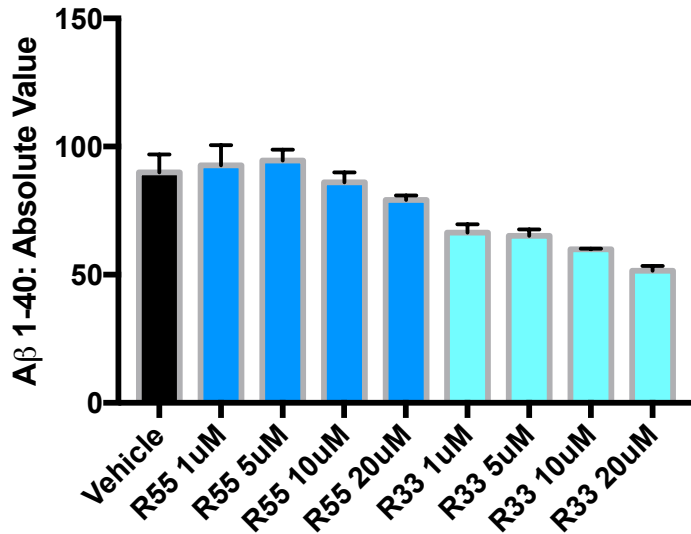

# Supplemental Figure 2

**A**

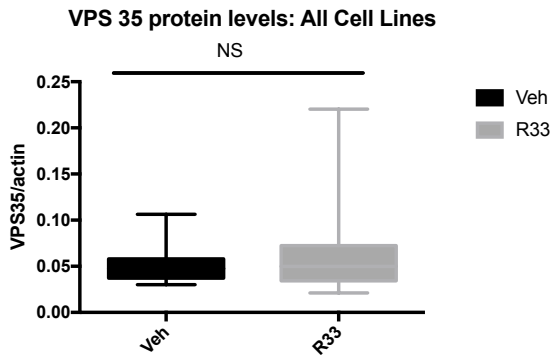

**B**

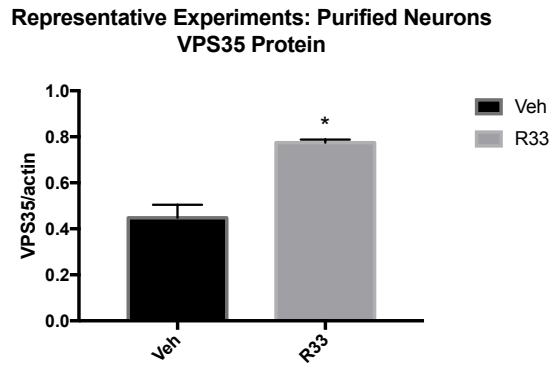

**C**

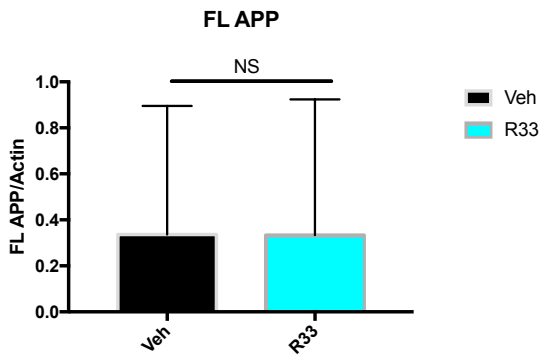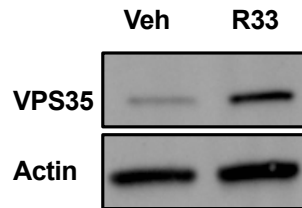

**D**

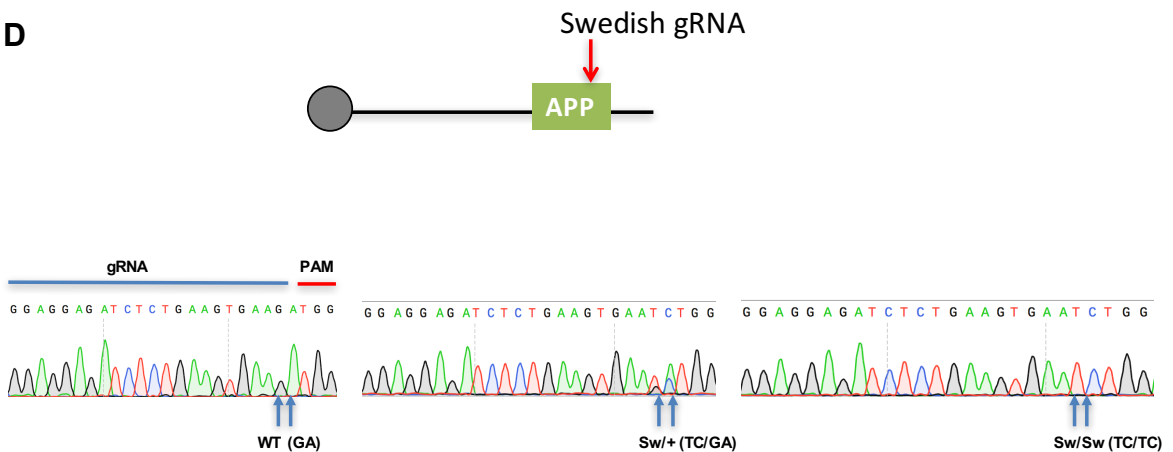

A

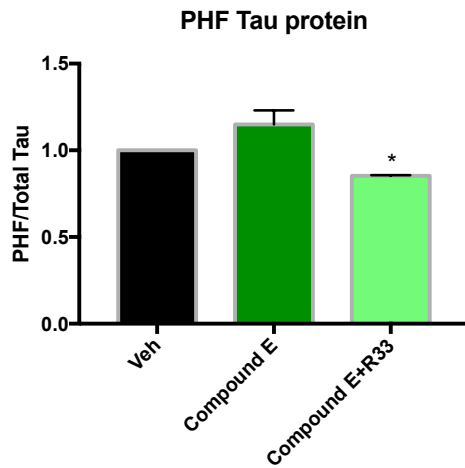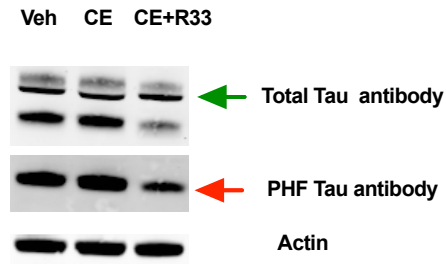

B

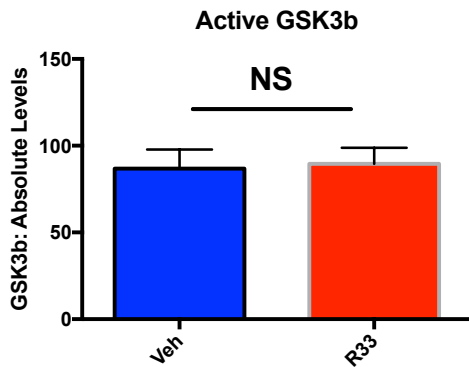

C

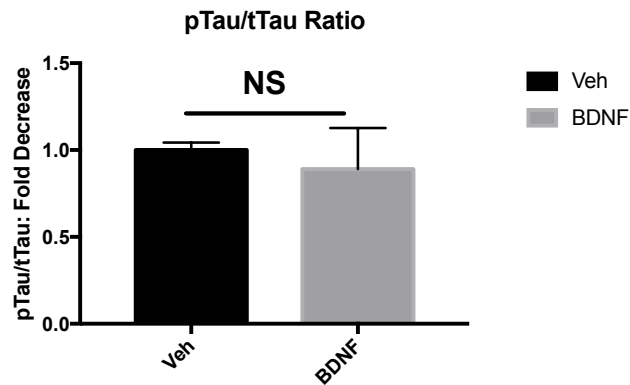

**A**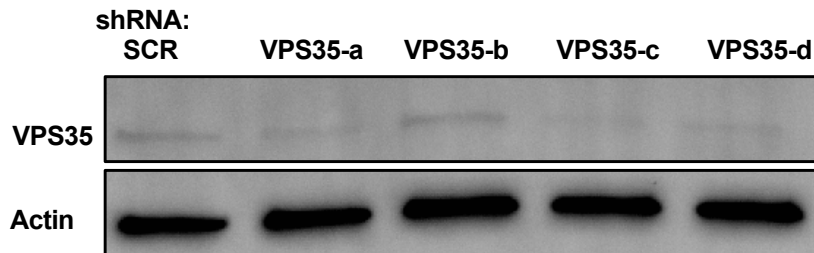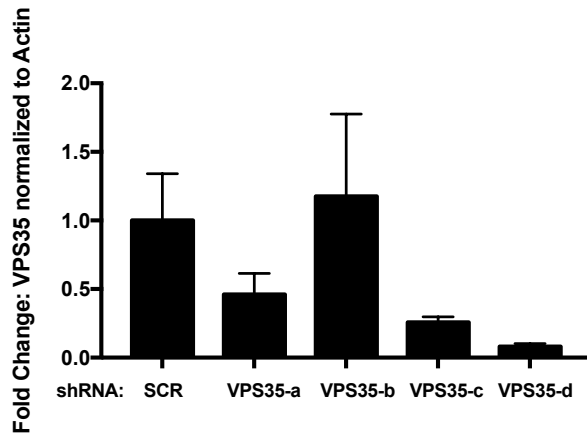

# Supplemental Figure 5

**A**

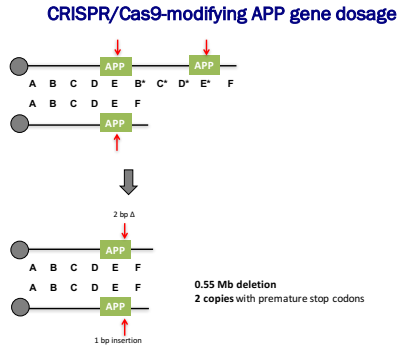

**WT**

APP exon 16: SGLTNIKTEEISEVKMetDAEFRHDSGYEVHHQKL  
APP exon 17: VFFAEDVGSNKGAIIGLMetVGGVVIATVIVITLVMetLKKKQYTSIHGGVVE  
APP exon 18: VDAAVTPEERHLSKMetQNGYENPTYKFFEQMetQNSop

**2 bp deletion**

APP exon 16: SGLTNIKTEEISEV\*\*\*DGCRIPTStopLRIStopSSSSKI  
APP exon 17: GVLCCRRCGFKQRCNHWTHGGRCHSDSDRHHLGDAAEETVHIHSSWCGG  
APP exon 18: StopRCHPRGAPPVQDAAERLRKSNLQVLSopADAEL

**1 bp insertion**

APP exon 16: SGLTNIKTEEISEV\*\*\*DGCRIPTStopLRIStopSSSSKI  
APP exon 17: GVLCCRRCGFKQRCNHWTHGGRCHSDSDRHHLGDAAEETVHIHSSWCGG  
APP exon 18: StopRCHPRGAPPVQDAAERLRKSNLQVLSopADAEL

**B**

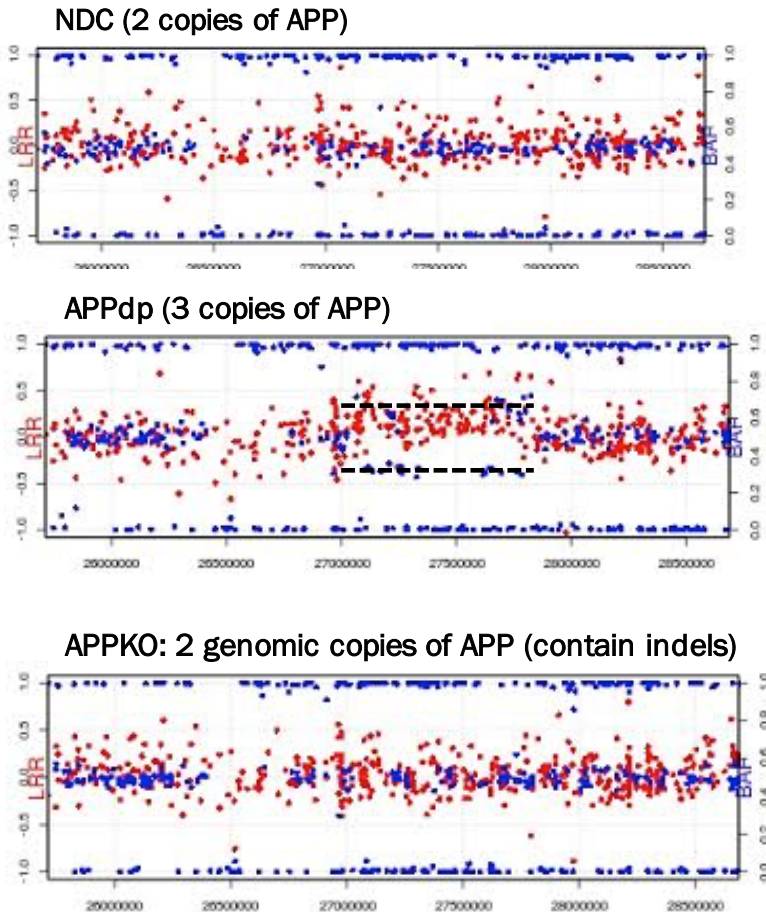

**C**

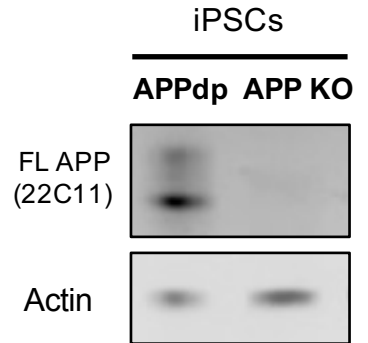

**A**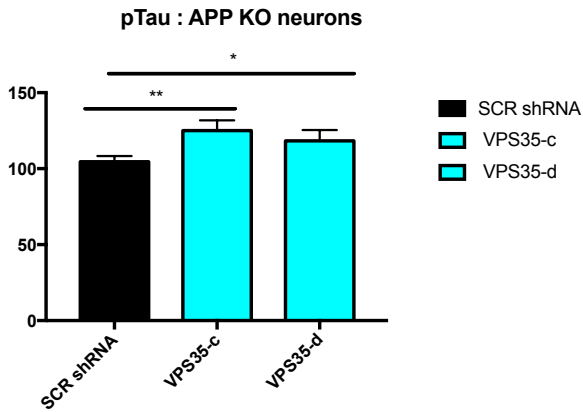**B**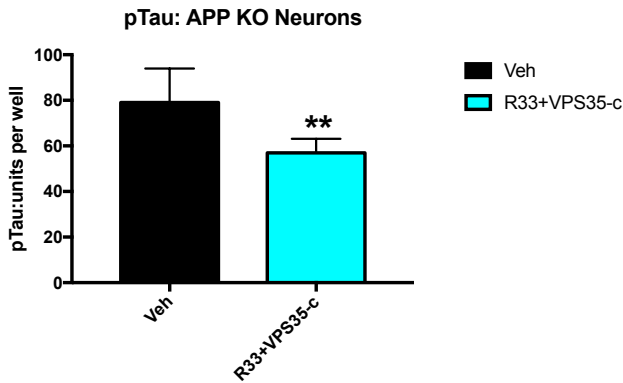

## Supplemental Figure Legends

**Supplemental Figure 1: Dose response of R55 and R33.** Dose response in WT control neurons with different concentration of retromer stabilizing chaperone molecules R55 or R33. In these samples, R33 was more effective at lowering A $\beta$  peptides than R55.

Error bars represent SD.

**Relates to Figure 1.**

## Supplemental Figure 2

**A-B: VPS35 protein stabilization.** Quantification of Western blots for VPS35 levels across all cell lines. Although when analyzed together, the effect of R33 is non-significant (**A**), in representative cell lines, an increase in VPS35 protein levels can be detected (**B**).

**C: FL APP expression.** Across all patient cell lines treatment with R33 did not change levels of FL APP

**D: CRISPR/Cas9 engineering of APP<sup>Swe</sup>.** Schematic of design for CRISPR/Cas9 mediated gene-editing for the APP Swedish (APP<sup>Swe</sup>) in WT hiPSCs. Sanger sequencing confirms heterozygous and homozygous incorporation of the mutation. For each comparison, a two-tailed T-test was performed or a Wilcoxon test was performed.

\*p<0.05

NS: Non-significant

Error bars represent SD.



**Relates to Figure 1 and 2.**

### **Supplemental Figure 3**

**A-B: Analysis of PHF TAU and GSK3 $\beta$ .** A. Quantification of Western blots for PHF and Total TAU of WT control cell lines treated with Compound E and R33. R33 reduces the PHF phospho epitope of TAU in hiPSC-derived purified neurons. Two-tailed t-test: \* $p < 0.05$  B. Analysis of TAU kinase GSK3 $\beta$  in hiPSC-derived purified neurons from all 13 individuals show no difference in activated GSK $\beta$  in response to R33 treatment.

Wilcoxon test: NS: non-significant

Error bars represent SD

**C.** Previous work demonstrated that hiPSC-derived neurons with protective haplotypes in the *SORL1* gene respond to BDNF treatment with reduced A $\beta$  peptides levels (Young et al., 2015). Treatment of hiPSC-derived neurons harboring *SORL1* protective haplotypes with the neurotrophin BDNF does not reduce the pTAU/tTAU ratio. N=3 independent experiments per condition Two-tailed t-test: NS: non-significant

**Relates to Figure 3.**

### **Supplemental Figure 4**

#### **Lentiviral knock-down of VPS35.**

**A.** Four shRNA constructs against *VPS35* (sh*VPS35* a, b, c, d) were packaged into lentiviral vectors. hiPSC-derived purified neurons were transduced for 72 hours and *VPS35* protein levels were analyzed by Western Blot. Three of four (sh*VPS35* a, c, d) constructs reduced *VPS35* protein levels.

Error bars represent SD.

**Relates to Figure 4 and Figure 6.**

### **Supplemental Figure 5**

#### **CRISPR/Cas9 engineering of APP null cells.**

**A.** Schematic of design for CRISPR/Cas9 mediated gene-editing for the APP KO cells from the APP duplication (APP<sup>Dp1</sup>) parental cell line. ABCDE represent one region of APP locus, B\*C\*D\*E\* represent duplicated region of APP locus that was excised during the gene-editing process. The remaining two copies of APP sustained indels that lead to premature stop codons.

**B.** Infinium HumanExome Bead Chip (Illumina) array data showing the loss of 0.55Mb in APP<sup>Dp</sup> hiPSCs. Top panel: Non-demented control cell line with two copies of APP. Middle panel: APP<sup>Dp</sup> hiPSCs showing duplicated region (dashed black bars). Bottom panel: APPKO hiPSCs showing two copies of APP. LRR: Log R Ratio; BAF: B Allele Frequency.

**C.** Western blot analysis showing that APP null hiPSCs do not express APP due to excision of one copy of APP and NHEJ-mediated indels in the remaining two copies leading to premature stop codons.

**Relates to Figure 6.**

### **Supplemental Figure 6**

**A.** Two shRNA constructs (shVPS35-c and shVPS35-d) increased phospho-TAU levels in

APP KO neurons. N=3 independent experiments per treatment/condition.

**B.** APP KO neurons expressing a *VPS35* shRNA (*VPS35-c*) still exhibited a significant decrease in pTAU after treatment with R33. N=3 independent experiments per treatment/condition.

A: For each comparison, a one-way ANOVA with a Tukey's multiple comparisons post-test was performed.

B: For each comparison, a two-tailed T-test was performed.

\*p<0.05

\*\*p<0.01

Error bars represent SD

**Relates to Figure 6**
